# Supplementary material for: A Systematic Study on Tooth Enamel Microstructures of Lambdopsalis bulla (Multituberculate, Mammalia) - Implications for Multituberculate Biology and Phylogeny
Source: PLoS One. 2015 May 28;10(5):e0128243. doi: 10.1371/journal.pone.0128243 (PMC4447277; doi:10.1371/journal.pone.0128243)
Supplement: S1 Table — SD, standard deviation about the prism diameter. (XLS) [file pone.0128243.s001.xls]

## Sheet: 工作表1
Specimen no.	Teeth	Position	prism diameter																				Prism size	SD	Prism number	Measure area	Prism density
V 20300.1	right di	Inner	7.72	8.26	7.5	6.85	7.83	8.26	7.94	7.93	6.96	7.61	7.94	9.57	8.91	8.15	8.04	7.61	8.04	9.02	8.8	8.37	8.0655	0.642771	31	12467	2486.56
		Middle	11.1	9.35	9.13	10	9.35	10.05	10.1	9.24	11.09	10.65	8.8	10.44	11.2	9.67	11.63	11.08	8.82	10.78	11.74	11.09	10.2655	0.917199	28	12467	2245.93
		Outer	8.04	8.92	9.12	9.51	9.22	8.73	11.23	10.79	8.76	8.48	10.43	9.02	9.24	9.67	8.91	10.76	9.24	9.67	8.37	8.26	9.3185	0.863379	11	12467	882.329
		prism central distance	19.38	17.85	17.57	18.9	13.78	20.41	16.19	24.48	17.1	20.87	25.2	22.1	26.33	16.34	13.77	24.32	17.37	18.63	13.62	13.28	18.8745	3.91435	3243	1.1547e+06
V 20298.2	right I2	Inner	10.9	10.32	8.26	12.39	8.77	10.79	11.14	9.04	9.39	10.53	11.14	9.21	9.12	8.86	9.74	8.16	10.61	8.6	9.12	8.16	9.7125	1.16089	108	13062.5	8267.94
		Middle	9.21	8.77	8.51	10.79	10.7	9.83	10.26	11.84	11.4	11.23	12.46	13.68	12.37	11.58	9.12	11.93	9.12	9.29	7.89	9.04	10.451	1.53651	101	13062.5	7732.06
		Outer	8.68	7.98	9.12	9.65	6.23	6.75	6.67	6.32	5.61	6.75	7.28	6.67	6.05	7.46	6.93	7.28	6.23	6.93	6.14	5.61	7.017	1.07632	45	13062.5	3444.98
		prism central distance	15.23	23.01	18.87	24.24	25.91	17.05	18.85	19.12	13.11	17.07	10.65	18.35	14.51	15.54	16.22	15.07	19.74	14.96	16.46	15.38	17.467	3.62385	3784.71	66107.5
V 20300.2	right i2	Inner	6.58	6.75	6.49	7.46	6.58	6.75	7.19	5.79	5.78	6.58	7.19	6.32	6.84	6.4	6.32	6.84	7.19	7.63	6.4	7.63	6.7355	0.513678	103	13750	7490.91
		Middle	7.19	7.11	7.9	8.7	8.51	7.72	7.63	8.72	7.54	7.37	7.9	8.33	8.68	8.25	8.86	8.68	7.72	9.12	7.37	8.86	8.108	0.617751	107	13750	7781.82
		Outer	6.93	6.58	7.19	7.02	6.58	7.37	5.79	6.75	7.37	6.84	6.93	6.32	7.54	6.14	6.4	6.49	7.54	7.11	6.84	7.54	6.8635	0.478908	51	13750	3709.09
		prism central distance	18.22	27.25	23.99	19.68	19.03	16.02	21.35	18.82	16.04	16.83	22.63	17.65	18.06	18.54	15.64	13.11	13.52	18.02	22.75	12.24	18.4695	3.66837	3385	62519.3
V 20299-3	right P4	Inner	7.63	6.49	6.58	5.7	6.67	6.49	6.32	5.44	5.88	6.58	5.79	7.11	6.32	7.19	6.49						6.44533	0.567989	17	3630	4683.2
		Middle	7.72	6.49	6.93	7.81	6.67	6.41	5.61	7.28	7.02	7.63	7.46	7.19	7.72	7.28	7.46	7.02	7.03	8.51	6.84	7.28	7.168	0.599221	28	3630	7713.5
		Outer	6.49	5.44	7.28	7.72	6.67	6.49	7.02	6.58	4.83	7.37	7.37	6.23	6.67	6.05	6.75	7.02	5.88	7.19	5.97	7.63	6.6325	0.725719	23	3630	6336.09
		prism central distance	12.7	17.05	10.44	13.78	13.77	10.32	12.61	14.09	10.2	14.51	11.94	12	9.86	11.9	13.38	13.86	11.39	14.25	10.72	12.06	12.5415	1.77482	7341.26	92070.4
V 20299-4	right p4	Inner	6.84	6.49	6.5	6.75	6.58	4.3	5.79	7.54	7.63	7.19	5.97	4.79	7.53	7.39	5.62	4.25	5.48	7.81	6.03	7.26	6.387	1.06202	47	15272	3077.53
		Middle	7.37	7.11	6.23	6.67	6.84	7.11	7.28	7.72	7.46	6.41	6.84	6.32	7.81	6.58	7.39	8.33	8.59	8.69	9.21	7.37	7.3665	0.806389	39	15272	2553.69
		Outer	7.28	7.54	4.35	5.78	5.97	5.88	5.7	5.88	5.97	5.62	6.4	9.18	8.63	6.99	7.67	6.03	7.53	7.12	5.34	6.58	6.572	1.13641	25	15272	1636.98
		prism central distance	9.95	15.31	15.05	12.26	11.14	14.89	13.73	17.34	13.09	10.39	15.4	13.19	16.17	12.6	12.84	11.71	10.1	18.1	10.81	18.26	13.6165	2.54545	6227.85	84801.6
V 20297.5	right m1	Inner	11.64	12.47	10.69	11.78	9.86	10.27	10.55	9.86	9.32	8.77	10.41	9.32	9.59	7.95	5.89	7.81	8.9	7.18	7.95	8.49	9.435	1.59334	79	18547	4259.45
		Middle	12.74	10.27	10.55	8.91	10.27	8.36	9.45	9.73	9.45	8.77	9.18	9.04	9.18	11.51	9.32	8.77	9.04	8.49	10.69		9.66947	1.07968	58	18547	3127.19
		Outer	7.67	8.36	7.67	8.9	8.22	8.77	8.49	5.89	7.37	6.31	7.26	6.85	7.39	6.85	6.71	7.26	6.43	7.26	6.3	5.89	7.2925	0.890611	30	18547	1617.51
		prism central distance	18.51	16.93	13.55	12.29	14.93	13.04	11.99	10.47	11.76	14.27	8.16	10.54	16.3	13.78	15.6	13.46	11.27	10.54	12.26	16.19	13.292	2.51912	6535.65	86871.8
V 20297.4	right m2	Inner	10.14	5.47	9.86	10.41	10.55	8.36	7.26	8.36	10.69	11.92	10.69	11.37	11.78	9.32	8.63	10.69	9.73	9.04	8.77	6.94	9.499	1.63199	180	34706	5186.42
		Middle	9.04	9.45	10.82	8.08	11.09	9.04	11.64	10.96	10.14	7.39	7.12	10.41	9.04	9.32	9.59	9.73	9.04	9.59	8.9	9.45	9.492	1.13278	159	34706	4581.34
		Outer	6.99	7.26	7.53	8.22	8.49	8.08	9.18	8.36	7.67	7.95	7.67	7.95	5.62	8.9	7.26	7.81	8.08	6.99	8.9	7.37	7.814	0.788285	103	34706	2967.79
		prism central distance	16.43	11.78	16.7	12.15	15.3	11.79	17.86	11.3	12.85	10.34	13.54	12.62	15.32	13.84	14.65	8.62	9.45	10.94	9.7	13.69	12.9435	2.49607	6892.33	89210.8
V 20298.6	right M1	Inner	8.08	7.53	7.26	7.67	7.53	8.49	8.5	6.03	6.3	9.18	8.49	6.3	8.49	8.63	7.81	6.98	6.44	7.67	6.44	8.08	7.595	0.902876	69	15444	4467.75
		Middle	11.23	10.41	11.1	11.37	10.82	9.04	10.27	9.45	10.69	8.77	10.82	11.09	11.37	10.82	10.96	11.92	11.37	10.96	9.18	9.45	10.5545	0.876587	81	15444	5244.76
		Outer	8.22	10.41	9.86	10.55	7.95	10.69	9.86	9.18	11.23	10.69	8.9	8.77	8.36	7.81	9.89	9.32	9.18	8.9	8.63	8.22	9.331	0.991912	67	15444	4338.25
		prism central distance	11.05	16.32	13.94	14.49	11.96	10.24	13.65	9.73	13.84	8.37	13.94	12.94	15.52	9.04	9.21	12.48	10.24	14.63	10.42	9.53	9.83856	2.38898	11027.4	117365
V 20297.7	right M2	Inner	7.67	8.91	11.1	12.1	11.92	10.82	11.64	10.96	11.64	11.92	11.94	10.69	12.33	9.86	10.27	10.27	10.68	9.32	10.41	9.32	10.6885	1.19356	135	22500	6000
		Middle	11.92	11.51	11.23	10.55	10.69	10.68	10.27	12.06	9.86	10.82	12.74	10.41	10.55	11.64	9.18	8.77	11.1	11.23	11.78	9.73	10.836	0.963542	96	22500	4266.67
		Outer	8.21	7.53	5.62	4.79	6.16	7.81	6.03	7.12	5.48	6.16	5.89	7.67	9.04	4.52	6.44	8.08	6.99	7.39	6.3	6.71	6.697	1.1452	42	22500	1866.67
		prism central distance	14.64	14.79	13.44	13.31	16.25	12.11	8.51	14.6	12.1	11.51	12.08	15.64	15.47	15.81	9.69	14.06	11.56	10.81	13.81	16.74	13.3465	2.19423	6482.38	86517.1
